# Supplementary material for: Vesicular Axonal Transport is Modified In Vivo by Tau Deletion or Overexpression in Drosophila
Source: MDPI journal article supplement (doi:10.3390/ijms19030744), 2018-03-06
Supplement: s1 [file s1]

## Supplementary Materials

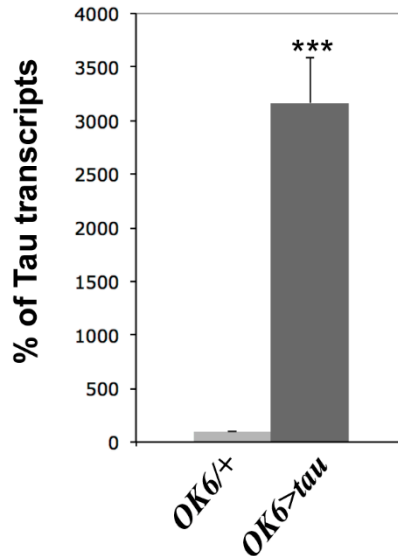

**Supplementary Figure S1.** quantitative RT-PCR on Tau overexpressing larvae. Histogram showing the relative percentage of *tau* transcripts (oligonucleotides within exon 1) in tau-overexpressing larvae (*OK6-Gal4/UAS-dTau1*) compared to the endogenous level of expression of *tau* in control larvae (*OK6-Gal4/+*), set at 100%. Results are mean  $\pm$  SEM of an experiment realized in triplicate. \*\*\*:  $p < 0.001$  (Student's *t*-test).

|                        | % pausing         | % outward movement      | % inward movement       |
|------------------------|-------------------|-------------------------|-------------------------|
| ctrl                   | 24.4 $\pm$ 1.9    | 41.7 $\pm$ 3.2          | 33.5 $\pm$ 2.9          |
| ep(3)3203              | 35.5 $\pm$ 3.9*   | 38.0 $\pm$ 3.5 (p=0.45) | 26.5 $\pm$ 2.2 (p=0.08) |
| ep(3)3203/Df(3R)BSC498 | 32.0 $\pm$ 3.0*   | 42.1 $\pm$ 4.4 (p=0.94) | 25.8 $\pm$ 4.2 (p=0.15) |
| overexp Tau            | 47.2 $\pm$ 5.3*** | 28.5 $\pm$ 8.0 (p=0.1)  | 24.3 $\pm$ 5.2 (p=0.1)  |

**Supplementary Table S1.** Percentages of time spent in anterograde movement, pausing or retrograde movement. Data are: mean  $\pm$  SEM.  $n = 15$  larvae for the control genotype;  $n = 11$  and 7 larvae for *tau<sup>ep3203</sup>* mutants and *tau<sup>ep3203</sup>/Df(3R)BSC498* mutants respectively;  $n = 11$  for tau-overexpressing larvae. \*:  $p < 0.05$ , \*\*\*:  $p < 0.001$  (Student's *t*-test).
